# Supplementary material for: High Prevalence of a Newly Discovered Wutai Mosquito Phasivirus in Mosquitoes from Rio de Janeiro, Brazil
Source: Insects. 2019 May 7;10(5):135. doi: 10.3390/insects10050135 (PMC6587333; doi:10.3390/insects10050135)
Supplement: Supplementary file 1 [file insects-10-00135-s001.xlsx]

## Sheet: banco rio
Place	Sample-ID	Culex spp. Male	Culex spp. Female	Culex engorged	Aedes spp. Male	Aedes spp. Female	Aedes spp. engorged	Bunyavirus PCR
Site 2	3068 A	0	0	1	0	0	0	Negative
Site 2	3068 B	0	0	1	0	0	0	Negative
Site 2	3068 C	0	0	1	0	0	0	Negative
Site 2	3069 A	0	0	1	0	0	0	Negative
Site 2	3069 B	0	0	1	0	0	0	Negative
Site 2	3069 C	0	0	1	0	0	0	Negative
Site 2	3069 D	0	0	1	0	0	0	Negative
Site 2	3069 E	0	0	1	0	0	0	Negative
Site 2	3077 A	0	0	1	0	0	0	Negative
Site 2	3077 B	0	0	1	0	0	0	Negative
Site 9	3086 A	0	0	1	0	0	0	Negative
Site 9	3086 B	0	0	1	0	0	0	Negative
Site 9	3086 C	0	0	1	0	0	0	Negative
Site 10	3095 A	0	0	1	0	0	0	Negative
Site 10	3100 A	0	0	1	0	0	0	Negative
Site 10	3100 B	0	0	1	0	0	0	Negative
Site 10	3115 A	0	0	1	0	0	0	Negative
Site 10	3115 B	0	0	1	0	0	0	Negative
Site 10	3115 C	0	0	1	0	0	0	Negative
Site 3	3143 A	0	0	1	0	0	0	Negative
Site 3	3143 B	0	0	1	0	0	0	Negative
Site 3	3143 C	0	0	1	0	0	0	Negative
Site 10	3138 A	0	0	1	0	0	0	Negative
Site 9	3026 C	0	0	1	0	0	0	Negative
Site 9	3026 D	0	0	1	0	0	0	Negative
Site 2	3031 A	0	0	1	0	0	0	Negative
Site 2	3031 B	0	0	1	0	0	0	Negative
Site 10	3055 A	0	0	1	0	0	0	Negative
Site 9	3081 A	0	0	1	0	0	0	Negative
Site 3	3143 D	0	0	1	0	0	0	Negative
Site 3	3143 E	0	0	1	0	0	0	Negative
Site 3	3143 F	0	0	1	0	0	0	Negative
Site 3	3143 G	0	0	1	0	0	0	Negative
Site 3	3143 H	0	0	1	0	0	0	Negative
Site 10	3152 A	0	0	1	0	0	0	Negative
Site 10	3152 B	0	0	1	0	0	0	Negative
Site 10	3152 C	0	0	1	0	0	0	Negative
Site 10	3152 D	0	0	1	0	0	0	Negative
Site 10	3152 E	0	0	1	0	0	0	Negative
Site 10	3152 F	0	0	1	0	0	0	Negative
Site 3	3155 A	0	0	1	0	0	0	Negative
Site 3	3155 B	0	0	1	0	0	0	Negative
Site 3	3155 C	0	0	1	0	0	0	Negative
Site 9	3160 A	0	0	1	0	0	0	Negative
Site 9	3161 A	0	0	1	0	0	0	Negative
Site 2	3170 A	0	0	1	0	0	0	Negative
Site 2	3170 B	0	0	1	0	0	0	Negative
Site 2	3170 C	0	0	1	0	0	0	Negative
Site 2	3170 D	0	0	1	0	0	0	Negative
Site 2	3170 E	0	0	1	0	0	0	Negative
Site 2	3170 F	0	0	1	0	0	0	Negative
Site 13	3175 A	0	0	1	0	0	0	Negative
Site 13	3175 B	0	0	1	0	0	0	Negative
Site 13	3175 C	0	0	1	0	0	0	Negative
Site 7	3179 A	0	0	1	0	0	0	Negative
Site 2	3187 A	0	0	1	0	0	0	Negative
Site 9	3028 A	0	0	0	0	0	1	Negative
Site 13	3176 A	0	0	0	0	0	1	Negative
Site 13	3176 B	0	0	0	0	0	1	Negative
Site 2	3207 A	0	0	1	0	0	0	Negative
Site 2	3207 B	0	0	1	0	0	0	Negative
Site 9	3024	0	6	0	0	0	0	Positive
Site 9	3025	5	0	0	0	0	0	Negative
Site 2	3030	0	25	0	0	0	0	Positive
Site 2	3032	22	0	0	0	0	0	Negative
Site 2	3066	18	0	0	0	0	0	Positive
Site 2	3067	0	12	0	0	0	0	Negative
Site 2	3070	0	18	0	0	0	0	Negative
Site 2	3071	15	0	0	0	0	0	Negative
Site 2	3075	125	0	0	0	0	0	Positive
Site 2	3076	0	22	0	0	0	0	Negative
Site 2	3078	0	0	0	1	0	0	Negative
Site 9	3079	24	0	0	0	0	0	Negative
Site 9	3080	0	12	0	0	0	0	Negative
Site 9	3082	0	0	0	0	2	0	Negative
Site 9	3083	0	0	0	1	0	0	Negative
Site 10	3093	0	0	0	7	0	0	Positive
Site 10	3094	0	0	0	0	1	0	Negative
Site 10	3096	152	0	0	0	0	0	Positive
Site 10	3097	0	0	0	0	152	0	Negative
Site 10	3098	0	0	0	0	3	0	Negative
Site 10	3099	0	0	0	4	0	0	Negative
Site 10	3101	195	0	0	0	0	0	Positive
Site 10	3102	0	98	0	0	0	0	Positive
Site 3	3141	0	0	0	11	0	0	Negative
Site 3	3142	0	0	0	0	4	0	Negative
Site 3	3144	0	18	0	0	0	0	Negative
Site 3	3145	21	0	0	0	0	0	Positive
Site 3	3153	0	0	0	0	7	0	Negative
Site 3	3154	0	0	0	4	0	0	Negative
Site 3	3156	0	12	0	0	0	0	Negative
Site 9	3159	0	0	0	0	6	0	Negative
Site 12	1770	0	10	0	0	0	0	Negative
Site 12	1771	25	0	0	0	0	0	Negative
Site 12	3323	25	0	0	0	0	0	Positive
Site 12	1773	16	0	0	0	0	0	Positive
Site 1	1875	0	1	0	0	0	0	Negative
Site 1	1877	10	0	0	0	0	0	Negative
Site 1	1881	0	4	0	0	0	0	Negative
Site 1	1884	7	0	0	0	0	0	Negative
Site 1	1880	7	0	0	0	0	0	Negative
Site 1	1887	28	0	0	0	0	0	Negative
Site 1	3316	0	25	0	0	0	0	Positive
Site 1	1899	0	3	0	0	0	0	Positive
Site 1	1890	3	0	0	0	0	0	Negative
Site 1	1892	7	0	0	0	0	0	Positive
Site 1	1893	0	2	0	0	0	0	Positive
Site 1	1898	3	0	0	0	0	0	Positive
Site 1	1902	25	0	0	0	0	0	Positive
Site 1	1863	0	6	0	0	0	0	Positive
Site 1	1907	0	1	0	0	0	0	Negative
Site 1	1908	0	2	0	0	0	0	Positive
Site 1	1910	7	0	0	0	0	0	Positive
Site 1	1912	6	0	0	0	0	0	Positive
Site 1	1914	0	6	0	0	0	0	Positive
Site 1	1915	2	0	0	0	0	0	Negative
Site 1	1919	0	8	0	0	0	0	Positive
Site 1	3326	0	16	0	0	0	0	Positive
Site 1	1932	2	0	0	0	0	0	Positive
Site 7	1933	5	0	0	0	0	0	Positive
Site 7	1935	0	1	0	0	0	0	Positive
Site 3	2047	0	1	0	0	0	0	Negative
Site 3	2051	0	24	0	0	0	0	Negative
Site 7	2040	0	0	0	1	0	0	Negative
Site 6	3321	12	0	0	0	0	0	Positive
Site 6	2013	7	0	0	0	0	0	Negative
Site 6	2010	5	0	0	0	0	0	Negative
Site 6	2014	0	8	0	0	0	0	Positive
Site 6	2004	0	1	0	0	0	0	Negative
Site 6	3318	25	0	0	0	0	0	Positive
Site 6	2018	0	13	0	0	0	0	Positive
Site 6	2023	0	21	0	0	0	0	Positive
Site 9	2043	3	0	0	0	0	0	Negative
Site 5	2035	0	15	0	0	0	0	Negative
Site 12	2175	17	0	0	0	0	0	Positive
Site 12	2185	0	16	0	0	0	0	Negative
Site 5	2224F	0	0	1	0	0	0	Negative
Site 5	2224G	0	0	1	0	0	0	Negative
Site 5	2224H	0	0	1	0	0	0	Negative
Site 5	2224I	0	0	1	0	0	0	Negative
Site 5	2224J	0	0	1	0	0	0	Negative
Site 5	2224K	0	0	1	0	0	0	Negative
Site 5	2224L	0	0	1	0	0	0	Negative
Site 5	2224M	0	0	1	0	0	0	Negative
Site 5	2224N	0	0	1	0	0	0	Negative
Site 5	2224O	0	0	1	0	0	0	Negative
Site 5	2224P	0	0	1	0	0	0	Negative
Site 5	2224Q	0	0	1	0	0	0	Negative
Site 5	2224R	0	0	1	0	0	0	Negative
Site 5	2224S	0	0	1	0	0	0	Negative
Site 5	2224T	0	0	1	0	0	0	Negative
Site 3	2235A	0	0	1	0	0	0	Negative
Site 3	2235B	0	0	1	0	0	0	Negative
Site 9	2240A	0	0	1	0	0	0	Negative
Site 9	2240B	0	0	1	0	0	0	Negative
Site 9	2240C	0	0	1	0	0	0	Negative
Site 9	2240D	0	0	1	0	0	0	Negative
Site 9	2240E	0	0	1	0	0	0	Negative
Site 9	2244A	0	0	1	0	0	0	Negative
Site 9	2244B	0	0	1	0	0	0	Negative
Site 9	2244C	0	0	1	0	0	0	Negative
Site 9	2244D	0	0	1	0	0	0	Negative
Site 9	2244E	0	0	1	0	0	0	Negative
Site 9	2244F	0	0	1	0	0	0	Negative
Site 9	2244G	0	0	1	0	0	0	Negative
Site 5	2252A	0	0	1	0	0	0	Negative
Site 5	2252B	0	0	1	0	0	0	Negative
Site 5	2252C	0	0	1	0	0	0	Negative
Site 5	2252D	0	0	1	0	0	0	Negative
Site 5	2252E	0	0	1	0	0	0	Negative
Site 5	2252F	0	0	1	0	0	0	Negative
Site 11	2273A	0	0	1	0	0	0	Negative
Site 11	2273B	0	0	1	0	0	0	Negative
Site 11	2273C	0	0	1	0	0	0	Negative
Site 11	2273D	0	0	1	0	0	0	Negative
Site 11	2273E	0	0	1	0	0	0	Negative
Site 11	2273F	0	0	1	0	0	0	Negative
Site 11	2273G	0	0	1	0	0	0	Negative
Site 11	2273H	0	0	1	0	0	0	Negative
Site 11	2273I	0	0	1	0	0	0	Negative
Site 11	2273J	0	0	1	0	0	0	Negative
Site 11	2273K	0	0	1	0	0	0	Negative
Site 9	2278A	0	0	1	0	0	0	Negative
Site 9	2278B	0	0	1	0	0	0	Negative
Site 9	2278C	0	0	1	0	0	0	Negative
Site 9	2278D	0	0	1	0	0	0	Negative
Site 9	2278E	0	0	1	0	0	0	Negative
Site 3	2284A	0	0	1	0	0	0	Negative
Site 3	2284B	0	0	1	0	0	0	Negative
Site 9	2297A	0	0	1	0	0	0	Negative
Site 9	2297B	0	0	1	0	0	0	Negative
Site 9	2297C	0	0	1	0	0	0	Negative
Site 9	2297D	0	0	1	0	0	0	Negative
Site 9	2297E	0	0	1	0	0	0	Negative
Site 8	2317A	0	0	1	0	0	0	Negative
Site 8	2317B	0	0	1	0	0	0	Negative
Site 8	2317C	0	0	1	0	0	0	Negative
Site 3	2330A	0	0	1	0	0	0	Negative
Site 3	2330B	0	0	1	0	0	0	Negative
Site 3	2330C	0	0	1	0	0	0	Negative
Site 7	2418A	0	0	1	0	0	0	Negative
Site 7	2418B	0	0	1	0	0	0	Negative
Site 7	2418C	0	0	1	0	0	0	Negative
Site 7	2418D	0	0	1	0	0	0	Negative
Site 7	2418E	0	0	1	0	0	0	Negative
Site 11	2059A	0	0	1	0	0	0	Negative
Site 11	2059B	0	0	1	0	0	0	Negative
Site 11	2059C	0	0	1	0	0	0	Negative
Site 11	2059D	0	0	1	0	0	0	Negative
Site 11	2059E	0	0	1	0	0	0	Positive
Site 11	2059F	0	0	1	0	0	0	Negative
Site 11	2059G	0	0	1	0	0	0	Negative
Site 11	2059H	0	0	1	0	0	0	Negative
Site 11	2059I	0	0	1	0	0	0	Negative
Site 11	2059J	0	0	1	0	0	0	Negative
Site 11	2059K	0	0	1	0	0	0	Negative
Site 11	2059L	0	0	1	0	0	0	Negative
Site 11	2059M	0	0	1	0	0	0	Negative
Site 11	2059N	0	0	1	0	0	0	Negative
Site 11	2059O	0	0	1	0	0	0	Negative
Site 11	2059P	0	0	1	0	0	0	Negative
Site 11	2059Q	0	0	1	0	0	0	Negative
Site 11	2059R	0	0	1	0	0	0	Negative
Site 11	2059S	0	0	1	0	0	0	Negative
Site 11	2059T	0	0	1	0	0	0	Negative
Site 11	2059U	0	0	1	0	0	0	Positive
Site 11	2059V	0	0	1	0	0	0	Negative
Site 11	2059W	0	0	1	0	0	0	Negative
Site 11	2059X	0	0	1	0	0	0	Negative
Site 11	2059Y	0	0	1	0	0	0	Negative
Site 11	2059Z	0	0	1	0	0	0	Negative
Site 11	2059AA	0	0	1	0	0	0	Negative
Site 11	2059AB	0	0	1	0	0	0	Negative
Site 11	2059AC	0	0	1	0	0	0	Positive
Site 11	2059AD	0	0	1	0	0	0	Negative
Site 11	2059AE	0	0	1	0	0	0	Negative
Site 11	2059AF	0	0	1	0	0	0	Negative
Site 11	2059AG	0	0	1	0	0	0	Negative
Site 11	2059AH	0	0	1	0	0	0	Negative
Site 11	2059AI	0	0	1	0	0	0	Negative
Site 11	2059AJ	0	0	1	0	0	0	Negative
Site 11	2059AK	0	0	1	0	0	0	Positive
Site 11	2059AL	0	0	1	0	0	0	Negative
Site 11	2059AM	0	0	1	0	0	0	Negative
Site 11	2059AN	0	0	1	0	0	0	Negative
Site 11	2059AO	0	0	1	0	0	0	Negative
Site 11	2059AP	0	0	1	0	0	0	Negative
Site 11	2111A	0	0	1	0	0	0	Positive
Site 11	2111B	0	0	1	0	0	0	Negative
Site 11	2111C	0	0	1	0	0	0	Negative
Site 11	2111D	0	0	1	0	0	0	Negative
Site 11	2111E	0	0	1	0	0	0	Negative
Site 11	2111F	0	0	1	0	0	0	Negative
Site 11	2111G	0	0	1	0	0	0	Negative
Site 11	2111H	0	0	1	0	0	0	Negative
Site 11	2111I	0	0	1	0	0	0	Negative
Site 11	2401	0	0	1	0	0	0	Negative
Site 11	2423	0	0	1	0	0	0	Negative
Site 11	2426	0	0	1	0	0	0	Negative
Site 11	2493	0	0	1	0	0	0	Negative
Site 11	2723	0	0	1	0	0	0	Negative
Site 11	2726	0	0	1	0	0	0	Negative
Site 11	2111J	0	0	1	0	0	0	Positive
Site 11	2111K	0	0	1	0	0	0	Positive
Site 11	2111L	0	0	1	0	0	0	Negative
Site 11	2111M	0	0	1	0	0	0	Negative
Site 11	2111N	0	0	1	0	0	0	Negative
Site 11	2111O	0	0	1	0	0	0	Positive
Site 9	2815	0	0	0	3	0	0	Negative
Site 9	2818	0	0	0	7	0	0	Negative
Site 9	2819	0	0	0	0	3	0	Negative
Site 3	2822	0	0	0	1	0	0	Negative
Site 3	2825	0	0	0	2	0	0	Negative
Site 3	2826	0	0	0	0	2	0	Negative
Site 7	2829	0	0	0	2	0	0	Negative
Site 7	2830	0	0	0	0	1	0	Negative
Site 7	2832	0	0	0	2	0	0	Negative
Site 7	2833	0	0	0	0	3	0	Negative
Site 9	2838	0	0	0	5	0	0	Negative
Site 9	2839	0	0	0	0	3	0	Negative
Site 3	2842	0	0	0	1	0	0	Negative
Site 7	2845	0	0	0	1	0	0	Negative
Site 2	2848	0	0	0	4	0	0	Negative
Site 2	2849	0	0	0	0	1	0	Negative
Site 4	2852	0	0	0	0	1	0	Negative
Site 3	2855	0	0	0	1	0	0	Negative
Site 3	2858	0	0	0	0	1	0	Negative
Site 9	2863	0	0	0	0	1	0	Negative
Site 2	2870	0	0	0	0	2	0	Negative
Site 2	2871	0	0	0	2	0	0	Negative
Site 2	2874	0	0	0	6	0	0	Negative
Site 2	2875	0	0	0	0	2	0	Negative
Site 2	2878	0	0	0	16	0	0	Negative
Site 2	2879	0	0	0	0	4	0	Negative
Site 9	2882	0	0	0	3	0	0	Negative
Site 9	2883	0	0	0	0	2	0	Negative
Site 9	2886	0	0	0	0	2	0	Negative
Site 3	2889	0	0	0	0	4	0	Negative
Site 3	2890	0	0	0	1	0	0	Negative
Site 9	2893	0	0	0	0	3	0	Negative
Site 2	2897	0	0	0	4	0	0	Negative
Site 2	2898	0	0	0	0	3	0	Negative
Site 7	2899	0	0	0	0	6	0	Negative
Site 2	2902	0	0	0	14	0	0	Negative
Site 9	2905	0	0	0	2	0	0	Negative
Site 3	2910	0	0	0	1	0	0	Negative
Site 3	2911	0	0	0	0	1	0	Negative
Site 4	2916	0	0	0	0	2	0	Negative
Site 2	2920	0	0	0	1	0	0	Negative
Site 2	2921	0	0	0	0	1	0	Negative
Site 9	2926	0	0	0	0	4	0	Negative
Site 9	2927	0	0	0	1	0	0	Negative
Site 10	2934	0	0	0	2	0	0	Negative
Site 10	2935	0	0	0	0	1	0	Negative
Site 4	2937	0	0	0	0	2	0	Negative
Site 2	2942	0	0	0	4	0	0	Negative
Site 2	2943	0	0	0	0	2	0	Negative
Site 3	2856A	0	0	1	0	0	0	Negative
Site 4	2864A	0	0	1	0	0	0	Negative
Site 4	2864B	0	0	1	0	0	0	Negative
Site 2	2867A	0	0	1	0	0	0	Negative
Site 2	2867B	0	0	1	0	0	0	Negative
Site 2	2867C	0	0	1	0	0	0	Negative
Site 2	2867D	0	0	1	0	0	0	Negative
Site 2	2867E	0	0	1	0	0	0	Negative
Site 2	2867F	0	0	1	0	0	0	Negative
Site 2	2867G	0	0	1	0	0	0	Negative
Site 2	3311	0	0	1	0	0	0	Positive
Site 2	2867I	0	0	1	0	0	0	Negative
Site 2	2867J	0	0	1	0	0	0	Negative
Site 2	2867K	0	0	1	0	0	0	Negative
Site 2	2867L	0	0	1	0	0	0	Negative
Site 2	2867M	0	0	1	0	0	0	Negative
Site 2	2941A	0	0	1	0	0	0	Negative
Site 2	2941B	0	0	1	0	0	0	Negative
Site 2	2941C	0	0	1	0	0	0	Negative
Site 3	2967A	0	0	1	0	0	0	Negative
Site 3	2967B	0	0	1	0	0	0	Negative
Site 2	2974A	0	0	1	0	0	0	Negative
Site 2	2979B	0	0	1	0	0	0	Negative
Site 3	2955	0	0	0	0	1	0	Negative
Site 3	2956	0	0	0	2	0	0	Negative
Site 2	2962	0	0	0	4	0	0	Negative
Site 2	2963	0	0	0	0	3	0	Negative
Site 9	2971	0	0	0	0	1	0	Negative
Site 9	2972	0	0	0	2	0	0	Negative
Site 2	2976	0	0	0	0	2	0	Negative
Site 2	2977	0	0	0	1	0	0	Negative
Site 2	2981	0	0	0	1	0	0	Negative
Site 7	2986	0	0	0	0	2	0	Negative
Site 7	2987	0	0	0	1	0	0	Negative
Site 7	2996	0	0	0	0	1	0	Negative
Site 7	2997	0	0	0	2	0	0	Negative
Site 10	3000	0	0	1	0	0	0	Negative
Site 10	3001	0	0	0	1	0	0	Negative
Site 2	3010	0	0	0	0	1	0	Negative
Site 3	3013	0	0	0	9	0	0	Negative
Site 7	3014	0	11	0	0	0	0	Negative
Site 7	3016	0	0	0	4	0	0	Negative
Site 7	3017	0	0	0	0	1	0	Negative
Site 7	3018	0	0	0	0	2	0	Negative
Site 2	3021	0	0	1	0	0	0	Negative
Site 2	3022	0	0	0	0	1	0	Negative
Site 2	3023	0	0	0	6	0	0	Negative
Site 9	3027	0	0	0	0	1	0	Negative
Site 9	3029	0	0	0	2	0	0	Negative
Site 2	3006A	0	0	1	0	0	0	Negative
Site 2	3006B	0	0	1	0	0	0	Negative
Site 2	3006C	0	0	1	0	0	0	Negative
Site 2	3006D	0	0	1	0	0	0	Negative
Site 2	3006E	0	0	1	0	0	0	Negative
Site 2	3006F	0	0	1	0	0	0	Negative
Site 2	3006G	0	0	1	0	0	0	Negative
Site 9	3026A	0	0	1	0	0	0	Negative

## Sheet: Tabela total
Rótulos de Linha	Soma de Culex M	Soma de Culex F	Soma de Culex ING	Soma de Aedes M	Soma de Aedes F	Soma de Aedes Ing
Site 1	107	74
Site 10	347	98	15	14	157
Site 11			74
Site 12	83	26
Site 13			3			2
Site 2	180	77	47	64	22
Site 3	21	55	21	33	20
Site 4			2		5
Site 5		15	21
Site 6	49	43
Site 7	5	12	6	13	16
Site 8			3
Site 9	32	18	31	26	28	1
(vazio)
Total Geral	824	418	223	150	248	3

## Sheet: Tabela contagem
Rótulos de Linha	Contagem de Culex M	Contagem de Culex F	Contagem de Culex ING	Contagem de Aedes M	Contagem de Aedes F	Contagem de Aedes Ing
Site 1	12	11
Site 10	2	1	15	4	4
Site 11			74
Site 12	4	2
Site 13			3			2
Site 2	4	4	47	13	11
Site 3	1	4	21	10	7
Site 4			2		3
Site 5		1	21
Site 6	4	4
Site 7	1	2	6	7	7
Site 8			3
Site 9	3	2	31	9	11	1
(vazio)
Total Geral	31	31	223	43	43	3

## Sheet: Localização
Site	Latitude	Longitude	Elevação	Culex male	Culex Female	Aedes Male	Aedes Female
site 1	-22.0407986	-41.0519199	7m	107	74
site 2	-22.9607612	-43.3565908	4m	180	77	64	22
site 3	-22.973734	-43.3853931	8m	21	55	33	20
site 4	-22.9754171	-43.3905077	5m	0	0
site 5	-22.8575996	-43.4054913	33m	0	15
site 6	-21.1997534	-41.9122044	119m	49	43
site 7	-22.9730508	-43.3823762	8m	5	12	13	16
site 8	-2275242	-434681097	10m	0	0
site 9	-22.9191205	-43.3654353	23m	32	18	26	28
site 10	-22.874336	-43.4310902	36m	347	98	14	157
site 11	-22.933596	-43.6611405	13m	0	0
site 12	-22.94511	-43.2541751	76m	83	26
site 13	-22.860865	-43.4066313	22m	0	0	0	0

## Sheet: Tabelas artigo
	Rótulos de Linha	Soma de Culex M	Contagem de Culex M	Soma de Culex F	Contagem de Culex F	Soma de Culex ING
	Site 1	107	12(6)	74	11(8)
	Site 2	180	4(2)	77	4(1)	47	1 (2,1%)
	Site 3	21	1(1)	55	4(0)	21
	Site 4					2
	Site 5			15	1(0)	21
	Site 6	49	4(2)	43	4(3)
	Site 7	5	1(1)	12	2(1)	6
	Site 8					3
	Site 9	32	3(0)	18	2(1)	31
	Site 10	347	2(2)	98	1(1)	15
	Site 11					74	8 (10%)
	Site 12	83	4(3)	26	2(0)
	Site 13					3
	Total Geral	824	31(17)	418	32(15)	223	9 (4,03%)
	Rótulos de Linha	Soma de Aedes M	Contagem de Aedes M	Soma de Aedes F	Contagem de Aedes F	Soma de Aedes Ing
	Site 2	64	13 (0)	22	11
	Site 3	33	10(0)	20	7
	Site 4			5	3
	Site 7	13	7(0)	16	7
	Site 9	26	9(0)	28	11	1
	Site 10	14	4(1)	157	4
	Site 13					2
	Total Geral	150	43	248	43	3
